# Supplementary material
Source: PubMed Central journal article supplement (PMC6587034)
Supplement: plantbiotechnology-33-5-16.1018a-s001.pdf [file plantbiotechnology-33-5-16.1018a-s001.pdf]

**Supplementary Table S1** Primers used in this study.

| Primer name                                                             | Primer equence (5' – 3')                       |
|-------------------------------------------------------------------------|------------------------------------------------|
| Construction of cloning site in pCHL3-SB                                |                                                |
| Y3-5-NheI                                                               | <u>gctagc</u> GTGTGTAGTAATTGGCA                |
| Y3-StuI-BglII-CP3                                                       | <u>agatctCaggcctGACTCGACTCAATTCTACG</u>        |
| Y3-StuI-BglII-CP5                                                       | <u>GAGTCaggcctGagatct</u> ATGGACAAATCTGAATCAAC |
| Y3-3-EcoRI                                                              | CGgaattcTGGTCTCCTTTTGGAGGC                     |
| Construction of cloning site in pCHL3-EB                                |                                                |
| Y3-5-NheI                                                               | <u>gctagc</u> GTGTGTAGTAATTGGCA                |
| Y3-EcoRV-BglII-CP3                                                      | <u>agatctCgatateGACTCGACTCAATTCTACG</u>        |
| Y3-EcoRV-BglII-CP5                                                      | <u>GAGTCgatateGagatct</u> ATGGACAAATCTGAATCAAC |
| Y-CP-3-100                                                              | GAAAGCTGCTGCGACAAGACTC                         |
| Isolation of <i>LIPDS</i>                                               |                                                |
| LIPDSdf                                                                 | GCAGAATTTGTTTGGGGAAC                           |
| LIPDSer                                                                 | CAATGGGGTGACATGCTCTA                           |
| Creation of 33-base <i>LIPDS</i> insert                                 |                                                |
| PDS33f                                                                  | CATagatctGCCTTCTACCTGCTATG                     |
| LIPDSbr                                                                 | TTGGAGCCATGCTTTTCCTG                           |
| Creation of 52-base <i>LIPDS</i> insert                                 |                                                |
| LIPDShf                                                                 | GCGgatateCGAGAGGTTGTGCATACCAAT                 |
| LIPDSdr                                                                 | GCGagatctTTGACCACCAATGATTGAA                   |
| Amplification of RNA1 genome                                            |                                                |
| CY2T7                                                                   | CCGGATCCGATTAATACGACTCACTATAGTTTATTTACAAGAGCC  |
| HL-1-3                                                                  | TGGTCTCCTTGTGGAGCC                             |
| Gene specific primers for qRT-PCR                                       |                                                |
| LIPDScf                                                                 | CAGGAAAAGCATGGCTCCAAG                          |
| LIPDSfr                                                                 | TCTCTCCATTCTTGAGGCAAA                          |
| Lh18SrRNAaf                                                             | TGCAACAAACCCCGACTTTC                           |
| Lh18SrRNAbr                                                             | CCGTCACCCGTCAATACCAT                           |
| Detection of CMV-HL vector and the deletion of the <i>PDS</i> fragments |                                                |
| HL3ff                                                                   | CTCCGCGAGATTGCGTTAT                            |
| HL3er                                                                   | ACGACCAGCTGCTAACGTCT                           |
| Detection of U6 small nuclear RNA                                       |                                                |
| U6af                                                                    | CGGGGACATCCGATAAAATTGGAACG                     |
| U6br                                                                    | CGATTTGTGCGTGTCAATCCTTGC                       |

Overlapped regions were underlined. Lower-case letters indicate restriction sites.

**Supplementary Table S2** Sequences of siRNAs and primers used for stem-loop pulsed RT and end-point PCR (5' – 3')

---

siRNA derived from *LIPDS 33*

Expected siRNA sequence *AAUCAUAGCAGGUAG* AAGGCA

PDS33\_Stem-loop RT primer GTTGGCTCTGGTGCAGGGTCCGAGGTATTCGCACCAGAGCCAACTGCCTT

PDS33\_Forward primer *TCGCGAATCATAGCAGGTAG*

siRNA derived from *LIPDS 52*

Expected siRNA sequence *UUGGUAUGCACAACC* UCUCGG

PDS52\_Stem-loop RT primer GTTGGCTCTGGTGCAGGGTCCGAGGTATTCGCACCAGAGCCAACCCGAGA

PDS52\_Forward primer *TCGCGTTGGTATGCACAACC*

---

Reverse complimentary sequences are underlined, and same forward sequences are in italic.

A universal reverse PCR primer in all cases is: GTGCAGGGTCCGAGGT.
