# Supplementary material
Source: PubMed Central journal article supplement (PMC6587034)
Supplement: plantbiotechnology-33-5-16.1018a-s002.pdf [file plantbiotechnology-33-5-16.1018a-s002.pdf]

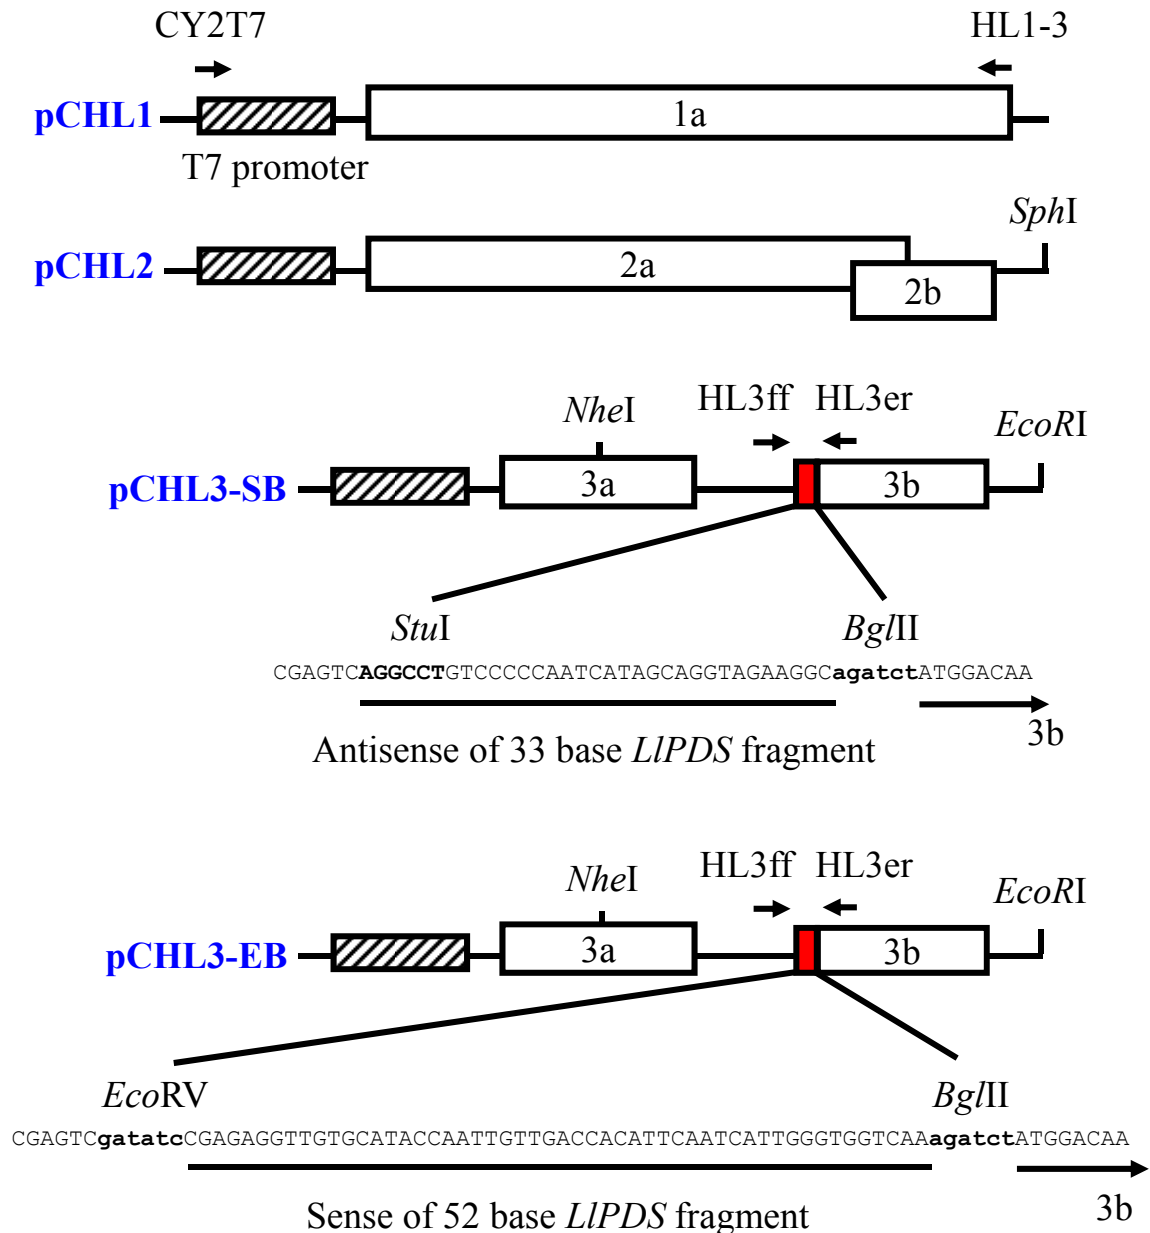

**Supplementary Figure S1.** Structure of the CMV-HL vector. Full-length CMV-HL RNA1, 2, and 3 genomes were respectively cloned downstream of the T7 promoter (named pCHL1, pCHL2, and pCHL3, respectively). *StuI*-*BglII* (SB) or *EcoRV*-*BglII* (EB) cloning sites were introduced between 3a and 3b in RNA3, and 33- or 52-nt fragments of *LIPDS* were respectively inserted into these sites. 1a and 2a encode the replication complex, 2b encodes the silencing suppressor, and 3a and 3b encode the movement and coat proteins, respectively. The CY2T7 and HL1-3 arrows indicate the position of the primers used to amplify the fragment including the T7 promoter and full RNA1 genome. *SphI* and *EcoRI* indicate the restriction sites at the 3' end of the RNA2 and 3 genomes, respectively. *NheI* and *EcoRI* indicate the restriction sites used to construct the cloning sites. The HL3ff and HL3er arrows indicate the positions of primers used to detect viral inoculation and the presence of the *LIPDS* fragments.

5' \_GGAGCACTCTATGATTTTTGCAATGCCAAACAAGCCAGGAGAATTCAGCCGCTTT  
GATTTTCCAGAGGTTCTTCCCTGCACCCTTAAATGGAATATGGGCCATCTTAAAGAATA  
ATGAAATGCTGACTTGGCCAGAAAAAGTGCGTTTTGCCATAGGCCCTTCTACCTGCTAT  
GATTGGGGGACAGGCCTATGTTGAGGCTCAGGATGGTTTAACTGTTAAAGAGTGGATG  
33 nt fragment  
AGGAAGCAGGGCGTTCCTGAACGTGTCAATGACGAAGTTTTATTGCAATGTCCAAAG  
CTCTTAATTTTATAAATCCAGATGAGCTTTCATGCAGTGCATTTTAAATTGCTTTAAA  
CCGTTTTCTTCAGGAAAAGCATGGCTCCAAGATGGCTTCTTAAATGGTAATCCTCCC  
GAGAGGTTGTGCATACCAATTGTTGACCACATTC AATCATTGGGTGGTCAAGTCCTAC  
52 nt fragment  
TTAACTCTCGTATACAGAAAATTGAGTTGAATTCTGATAGTACTGTGAAAAACCTTAT  
ACTGAGCAATGGGAAAATAATCAATGGAGATGTTTATGTAATAGCTACTCCTGTTGAT  
GTCTTGAAGCTTCTTTTGCCTCAAGAATGGAGAGAAATTCATACTTCAAGAAATTGG  
ATAAATTGGTGGGAGTTCCTGTAATCAATGTTTCATATATGGTTTGACAGGAACTGAA  
GAACACCTATGATCATCTTCTTTTCAGCAGGAGTCCTCTTTTGAGTGTTTATGCAGAT  
ATGTCTGTAACCTGCAAGGAATATTACGATCCTTATCGTTCTATGCTTGAGTTGGTGT  
TCGCACCGGCAGAGGAATGGATCTCACGTAGTGATGATGAGATCATCGATGCTACAAT  
GACAGAACTGGCTAAGCTGTTCCCAGATGAAATAGCCGCAGATCAGAGTAAAGCGAAA  
ATTCTCAAGTATCATGTTGTCAAACTCCAAGATCTGTTTACAAACTGTGCCCGACT  
GTGAACCGTGCCGGCCTCTGCAAAGATCGCCAATTGAAGGGTTCATCTGGCTGGCGA  
TTATACGAAGCAGAAGTACTTGGCTTCGATGGAGGGGGCTGTTTTGTCTGGGAAGCTT  
TGTGCGCAGTCTATTGTACAGGATTACGACATTTTAGTTGATCGGACGAAGAGAAGCC  
CTCAAGCAGAGATGTCAGTCGTCTAGTTGCGAAATTTGGAGTCATAGCAGACATCTTG  
CTTATACAATGTATTCTTTGCATGCTGAGAAAATCAGATCTCAGAATATATACA\_3'

**Supplementary Figure S2** Partial nucleotide sequence of *LIPDS* (DBJ accession: LC155113). Sequences used to induce silencing are shown in red. The *StuI* site used for cloning is underlined.

pCHL3-EB52 CTCCGCGAGATTGCGTTATTGTCTACTGACTATATAGAGAGAGTTTGTGCTGTGTTTTCT  
fragment 1 CTCCGCGAGATTGCGTTATTGTCTACTGACTATATAGAGAGAGTTTGTGCTGTGTTTTCT  
fragment 2 CTCCGCGAGATTGCGTTATTGTCTACTGACTATATAGAGAGAGTTTGTGCTGTGTTTT-CT  
fragment 3 CTCCGCGAGATTGCGTTATTGTCTACTGACTATATAGAGAGAATTTGTGCTGTGTTTTCT  
\*\*\*\*\* \*\*

pCHL3-EB52 CTTTTGTGTCGTAGAATTGAGTCGAGTCgatatcCGAGAGGTTGTCATACCAATTGTTGA  
fragment 1 CTTTTGTGTCGTAGAATTGAGT-----cCGAGAGGTTGTCATACCAA-----  
fragment 2 CTTTTGTGTCGTAGAATTGAGTCGAGTCgatatcCG-----  
fragment 3 CTTTTGTGTCGTAGAATTGAGTCGA-----  
\*\*\*\*\*

pCHL3-EB52 **CCACATTCAATCATTGGGTGGTCAA**agatctATGGACAAATCTGAATCAACCAGTGCCGGT  
fragment 1 -----ctATGGACAAATCTGAATCAACCAGTGCCGGT  
fragment 2 -----tATGGACAAATCTGAATCAACCAGTGCCGGT  
fragment 3 -----ctATGGACAAATCTGAATCAACCAGTGCCGGT  
\*\*\*\*\*

pCHL3-EB52 CGTAGCCGTCGACGTCGTCCGCGTCGTGGTTCCCGCTCCGCCCTCCTCCGCGGATGCTA  
fragment 1 CGTAGCCGTCGACGTCGTCCGCGTCGTGGTTCCCGCTCCGCCCTCCTCCGCGGATGCTA  
fragment 2 CGTAGCCGTCGACGTCGTCCGCGTCGTGGTTCCCGCTCCGCCCTCCTCCGCGGATGCTA  
fragment 3 CGTAGCCGTCGACGTCGTCCGCGTCGTGGTTCCCGCTCCGCCCTCCTCCGCGGATGCTA  
\*\*\*\*\*

pCHL3-EB52 ACTTTAGAGTCTTGTGCGCAGCAGCTTTCGCGACTTAATAAGACGTTAGCAGCTGGTCGT  
fragment 1 ACTTTAGAGTCTTGTGCGCAGCAGCTTTCGCGACTTAATAAGACGTTAGCAGCTGGTCGT  
fragment 2 ACTTTAGAGTCTTGTGCGCAGCAGCTTTCGCGACTTAATAAGACGTTAGCAGCTGGTCGT  
fragment 3 ACTTTAGAGTCTTGTGCGCAGCAGCTTTCGCGACTTAATAAGACGTTAGCAGCTGGTCGT  
\*\*\*\*\*

**Supplementary Figure S3** Comparison of cDNA sequences of pCHL3-EB52 (original) and three viral fragments amplified from leaves #3 and #4 of the P52 plant. Underlined sequences indicate the position of the primers (HL3ff and HL3er) used to amplify the fragments. Lower-case letters indicate *EcoRV* (gatatc) and *BgIII* (agatct) recognition sequences. Nucleotides shown in red represent the *LIPDS* sequence. Note that only the fragment 1 sequence was detected in leaf #4, whereas all three fragment sequences were amplified from leaf #3.
